# Supplementary material for: The synthesis and pH-dependent behaviour of Re(CO)3 conjugates with diimine phenolic ligands
Source: Royal Society of Chemistry journal article supplement (doi:10.1039/c3dt50894c), 2013-01-01
Supplement: c3dt50894c.pdf [file c3dt50894c.pdf]

Supporting Information to:

**The synthesis and pH-dependent behaviour of  $\text{Re}(\text{CO})_3$  conjugates  
with diimine phenolic ligands**

*Kullapa Chanawanno,<sup>a</sup> James T. Engle,<sup>a</sup> Kevin X. Le,<sup>b</sup> Richard S. Herrick<sup>b</sup> and Christopher J. Ziegler<sup>\*,a</sup>*

<sup>a</sup>Department of Chemistry, University of Akron, Akron, OH 44325-3601, United States.

<sup>b</sup>Department of Chemistry, College of the Holy Cross, Worcester, MA 01610, United States.

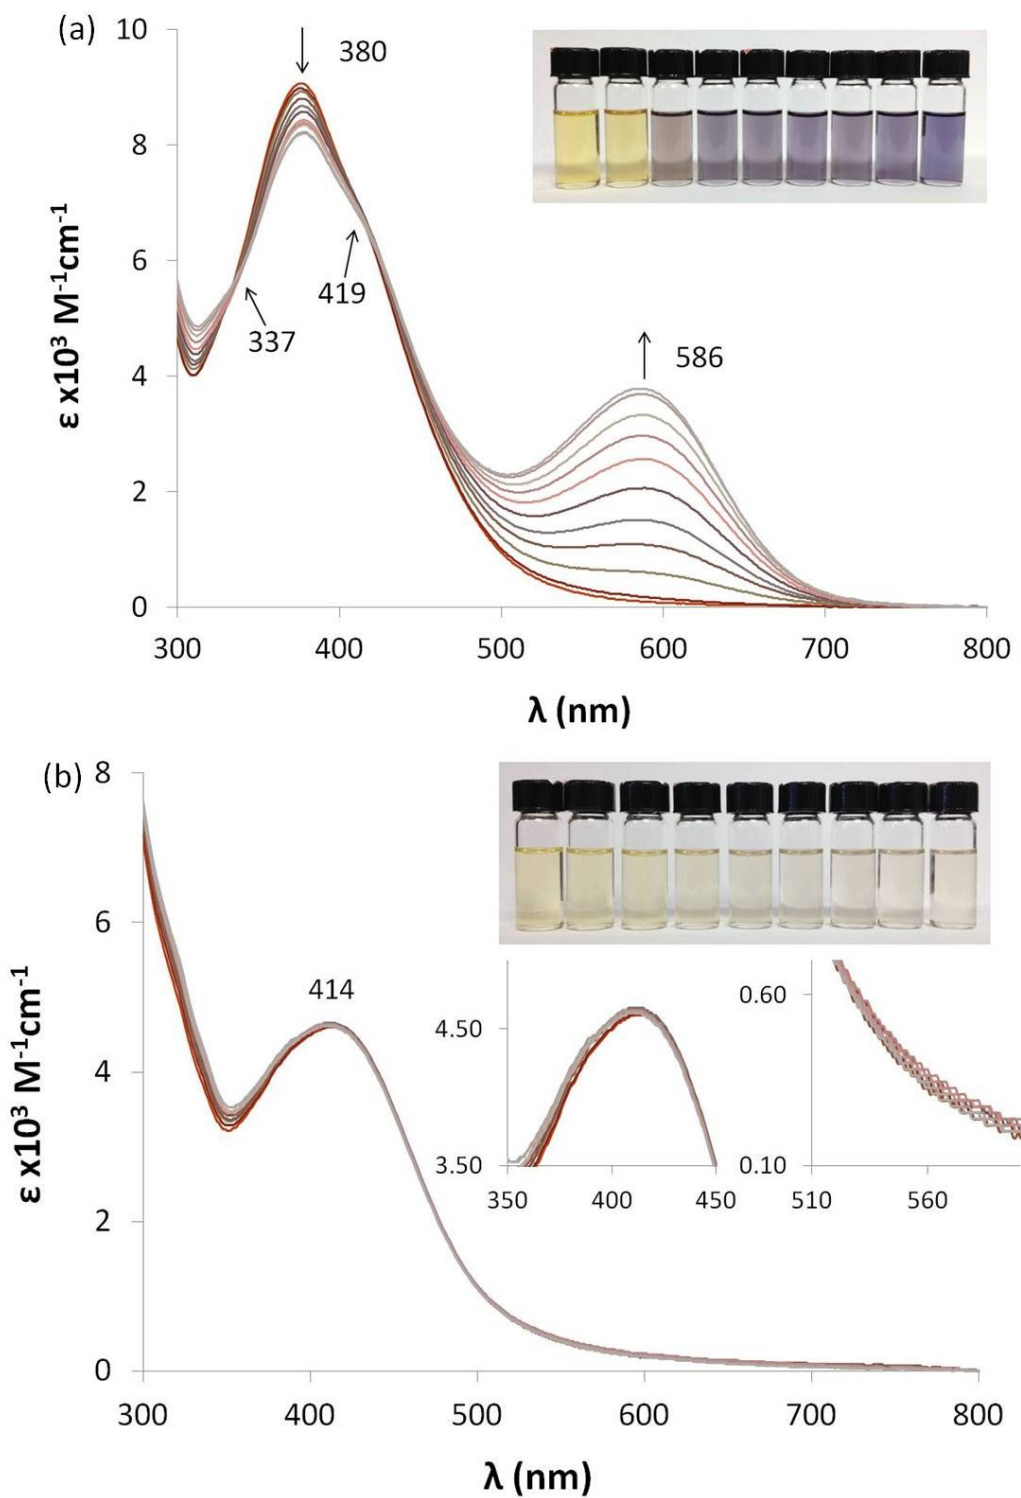

**Fig. S1** Overlaid UV-visible absorption spectra of **1** (a) and **3** (b) in THF upon addition of 0.0-1.0 equivalent TMAH.
